# Supplementary material for: Photoinduced electron transfer in novel CdSe–Cu2Se type II core–shell quantum dots
Source: Royal Society of Chemistry journal article supplement (doi:10.1039/c9ra02027f), 2019-01-01
Supplement: c9ra02027f1.pdf [file c9ra02027f1.pdf]

## Supplementary Material

### 1. Tauc plots of CdSe and CdSe-Cu<sub>2</sub>Se core-shell QDs

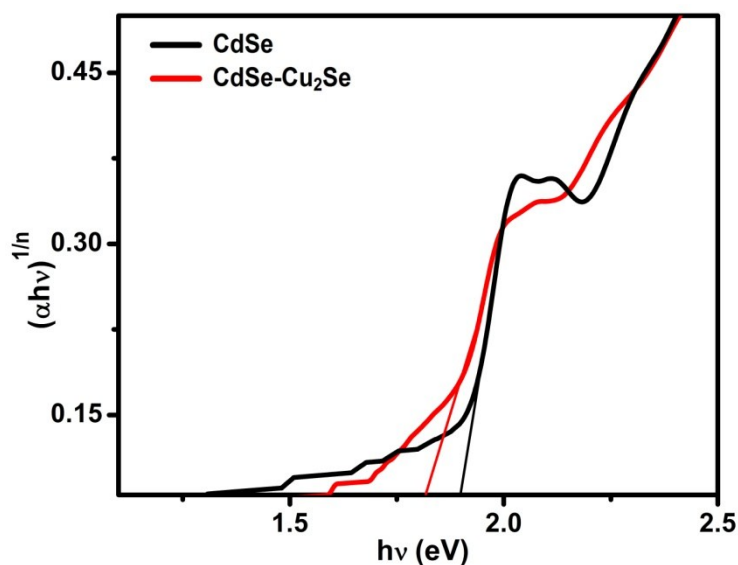

Fig. S1. Tauc plots for CdSe QD and CdSe-Cu<sub>2</sub>Se QDs. Term 'n' take values  $\frac{1}{2}$  and 2 for CdSe (direct band gap) and CdSe-Cu<sub>2</sub>Se (indirect band gap) respectively.

### 2. Absorption and Emission spectra of CdSe and CdSe-Cu<sub>2</sub>Se core-shell QDs

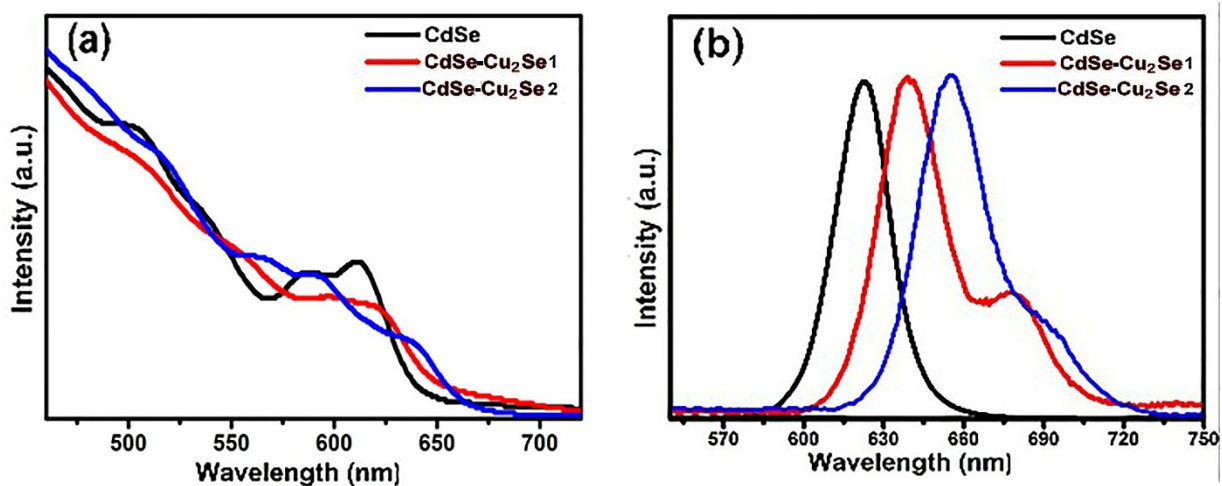

Fig. S2. Absorption and emission features of the CdSe QDs and CdSe-Cu<sub>2</sub>Se core-shell QDs of different shell thicknesses.

### 3. Gaussian fitting to the emission spectra of CdSe-Cu<sub>2</sub>Se core-shell QDs

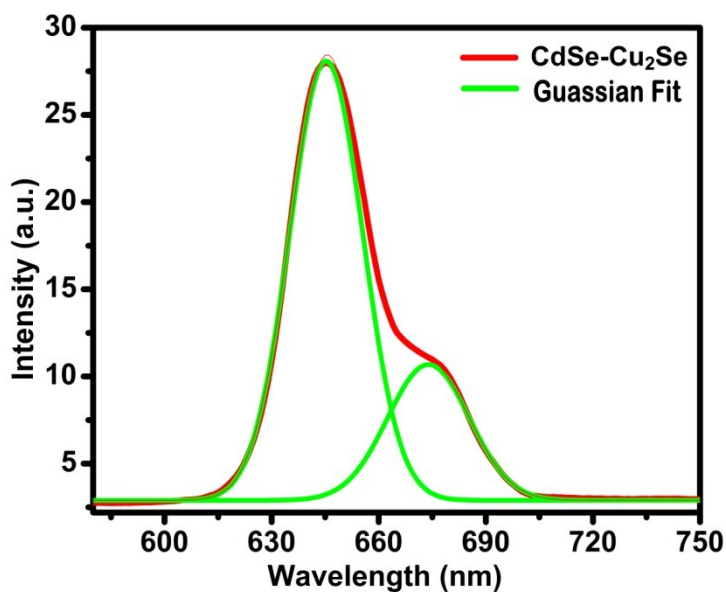

Fig. S3. PL spectrum CdSe-Cu<sub>2</sub>Se core-shell QDs fitted with a Gaussian curve.

Table S1: Gaussian fit details to the PL spectrum of CdSe-Cu<sub>2</sub>Se QDs

| Peak | Area (nm <sup>2</sup> ) | Center (nm) | Width (nm) | Height    |
|------|-------------------------|-------------|------------|-----------|
| 1    | 6487551.04              | 645.26      | 20.54      | 252006.61 |
| 2    | 2234293.15              | 673.93      | 22.89      | 77870.41  |

#### 4. Cyclic Voltammograms of CdSe and Cu<sub>2</sub>Se QDs

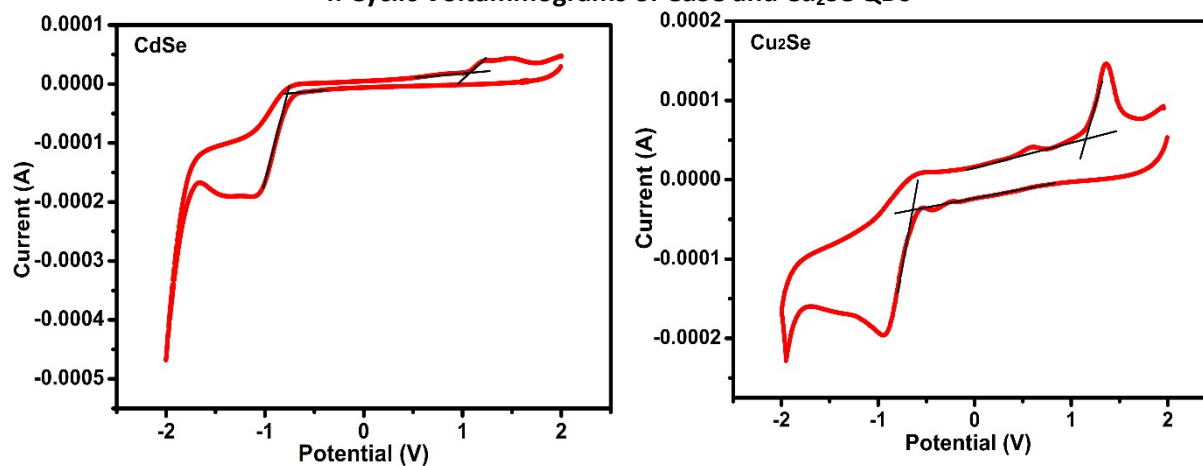

Fig. S4. Cyclic voltammograms (CVs) of CdSe and Cu<sub>2</sub>Se QDs.

## 5. TEM image and SAED pattern of CdSe QDs

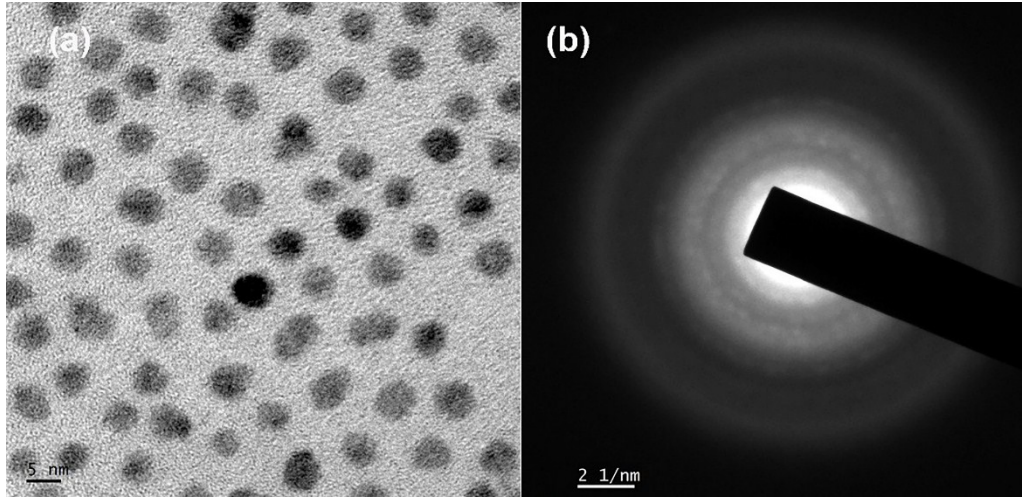

Fig. S5: TEM image of (a) CdSe QDs and (b) its SAED pattern.

## 6. Shell thickness calculation

The appraisal of shell thickness of CdSe-Cu<sub>2</sub>Se QDs was done using inductively coupled plasma atomic emission spectroscopy (ICP-AES) and high-resolution transmission electron microscopy (HR-TEM) results.

The calculation was done using the following equation

$$r = \frac{R}{3\sqrt{1 + \frac{V_{Cu_2Se}}{V_{CdSe}}}} \quad (1)$$

where,

$r$  is the radius of the core

$R$  is the radius of core-shell QD

$V_{CdSe}$  is the volume of the core

$V_{Cu_2Se}$  is the volume of the shell

We got the radius  $R$  of core-shell QDs from TEM images (2.95 nm). The ratio  $V_{CdSe}/V_{Cu_2Se}$  can be calculated using the atomic and the molecular masses  $M_x$ , bulk densities  $\rho_x$  and mass ratio  $\frac{m_{Cd}}{m_{Cu}}$  (obtained from ICPAES results) based on the following relation

$$\frac{V_{CdSe}}{V_{Cu_2Se}} = \frac{m_{Cd}}{m_{Cu}} \times \frac{M_{Cu}}{M_{Cd}} \times \frac{M_{CdSe}}{M_{Cu_2Se}} \times \frac{\rho_{Cu_2Se}}{\rho_{CdSe}} \quad (2)$$

$$= 0.6171 \times \frac{m_{Cd}}{m_{Cu}}$$

From ICPAES studies, we got

$$\frac{m_{Cd}}{m_{Cu}} = \frac{29.17}{11.53} = 2.53$$

Therefore,  $\frac{V_{CdSe}}{V_{Cu_2Se}} = 1.56$

Substituting these results in equation (1), we get

Radius of the core  $r = 2.50$  nm

Shell thickness  $H = 0.45$  nm.

Radius of CdSe core obtained from TEM images was 2.55 nm. The estimated value matches with the experimental result.

## 7. EDS spectrum of CdSe QDs

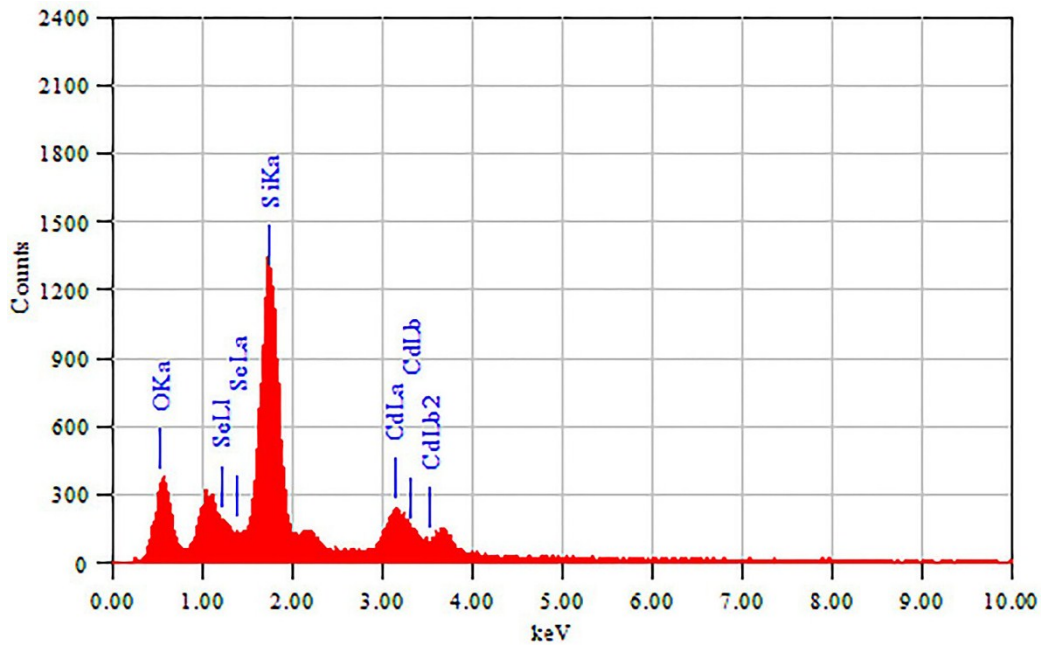

Fig. S6: EDS spectrum of CdSe QDs.

### 8. XPS spectrum of CdSe QDs

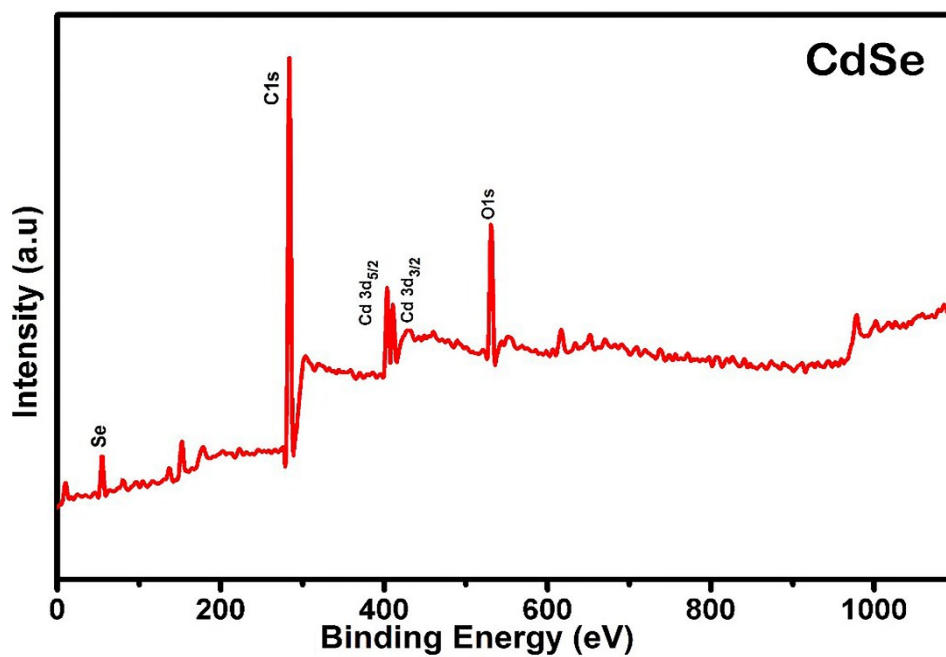

Fig. S7: XPS Spectrum of CdSe QDs.

### 9. Schematic representation

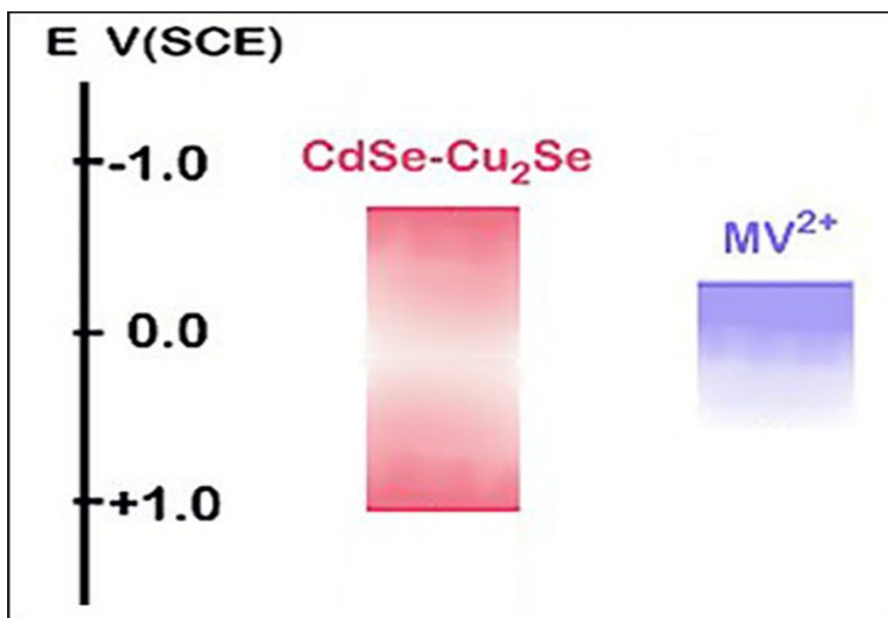

Scheme S1: Schematic picture showing the thermodynamic favorability of the electron transfer between QDs and MV<sup>2+</sup>.

## 10. Lifetime calculations

The emission decay kinetics for CdSe and CdSe-Cu<sub>2</sub>Se fitted multi-exponentially (3<sup>rd</sup> order) using the equation

$$\tau_{avg} = \frac{a_1\tau_1^2 + a_2\tau_2^2 + a_3\tau_3^2}{a_1\tau_1 + a_2\tau_2 + a_3\tau_3} \quad (3)$$

Table S2: Average lifetime of bare CdSe and overcoated CdSe-Cu<sub>2</sub>Se QDs

| Sample                  | $\tau_1, ns$ | $a_1$ | $\tau_2, ns$ | $a_2$ | $\tau_3, ns$ | $a_3$ | $\tau_{avg}, ns$ | $\chi^2$ |
|-------------------------|--------------|-------|--------------|-------|--------------|-------|------------------|----------|
| CdSe                    | 0.285        | 27.56 | 3.792        | 40.08 | 17.68        | 32.36 | 14               | 1.267039 |
| CdSe-Cu <sub>2</sub> Se | 0.835        | 18.18 | 6.58         | 34.41 | 34.23        | 47.41 | 30               | 1.204785 |

Table S3: Average lifetime of CdSe-Cu<sub>2</sub>Se QDs/MV<sup>2+</sup> complex upon successive additions (0.2  $\mu$ M) of MV<sup>2+</sup>

| Sample                           | $\tau_1, ns$ | $a_1$ | $\tau_2, ns$ | $a_2$ | $\tau_3, ns$ | $a_3$ | $\tau_4, ns$ | $a_4$ | $\tau_{avg}, ns$ | $\chi^2$ |
|----------------------------------|--------------|-------|--------------|-------|--------------|-------|--------------|-------|------------------|----------|
| QDs/0.2 $\mu$ M MV <sup>2+</sup> | 0.419        | 36.83 | 3.05         | 37.33 | 9.94         | 9.74  | 39.0         | 16.13 | 21               | 1.185496 |
| QDs/0.4 $\mu$ M MV <sup>2+</sup> | 0.380        | 15.32 | 2.92         | 34.59 | 9.40         | 37.77 | 34.52        | 12.32 | 20               | 1.060308 |
| QDs/0.6 $\mu$ M MV <sup>2+</sup> | 0.430        | 16.09 | 3.05         | 35.38 | 9.59         | 37.30 | 35.88        | 11.23 | 20               | 1.067175 |
